# Supplementary material for: Modes of Action of a Novel c-MYC Inhibiting 1,2,4-Oxadiazole Derivative in Leukemia and Breast Cancer Cells
Source: MDPI journal article supplement (doi:10.3390/molecules28155658), 2023-07-26
Supplement: s1 [file s1]

## Supplementary Tables

### **Modes of action of a novel c-MYC inhibiting 1,2,4-oxadiazole derivative in leukemia and breast cancer cells**

Min Zhou<sup>1</sup>, Joelle C. Boulos<sup>1</sup>, Ejlal A. Omer<sup>1</sup>, Sabine M. Klauck<sup>2</sup>, Thomas Efferth<sup>1</sup>

<sup>1</sup> Department of Pharmaceutical Biology, Institute of Pharmaceutical and Biomedical Sciences, Johannes Gutenberg University-Mainz, Staudinger Weg 5, 55128 Mainz, Germany

<sup>2</sup> Division of Cancer Genome Research, German Cancer Research Center (DKFZ), German Cancer Consortium (DKTK), National Center for Tumor Disease (NCT), Im Neuenheimer Feld 460, 69120 Heidelberg, Germany

\* **Correspondence to:** Prof. Dr. Thomas Efferth, E-mail: [efferth@uni-mainz.de](mailto:efferth@uni-mainz.de)

**Supplementary Table S1:** Deregulated gene expression upon treatment of CCRF-CEM leukemia cells with the IC<sub>50</sub> concentration of ZINC15675948 for 24 h.

| <b>Symbol</b>   | <b>Gene name</b>                                                        | <b>Fold change of expression</b> |
|-----------------|-------------------------------------------------------------------------|----------------------------------|
| <i>PGK1</i>     | Phosphoglycerate kinase 1                                               | -894.824                         |
| <i>H2BC15</i>   | H2B-clustered histone 15                                                | -874.55                          |
| <i>NREP</i>     | Neuronal regeneration-related protein                                   | -782.619                         |
| <i>ATP5MF</i>   | ATP synthase membrane subunit f                                         | -774.632                         |
| <i>ATP5MC1</i>  | ATP synthase membrane subunit c locus 1                                 | -623.959                         |
| <i>ANXA2</i>    | Annexin A2                                                              | -609.842                         |
| <i>GPI</i>      | Glucose-6-phosphate isomerase                                           | -585.909                         |
| <i>RPL36A</i>   | Ribosomal protein L36a                                                  | -564.794                         |
| <i>H2AC14</i>   | H2A-clustered histone 14                                                | -558.444                         |
| <i>STARD7</i>   | StAR-related lipid transfer domain containing 7                         | -554.385                         |
| <i>MBTPS1</i>   | Membrane-bound transcription factor peptidase, site 1                   | -466.755                         |
| <i>MYC</i>      | MYC proto-oncogene, bHLH transcription factor                           | -436.409                         |
| <i>AASDHPPT</i> | Aminoadipate-semialdehyde dehydrogenase-phosphopantetheinyl transferase | -423.601                         |
| <i>SNU13</i>    | Small nuclear ribonucleoprotein 13                                      | -401.352                         |
| <i>DNAJC7</i>   | DnaJ heat shock protein family (Hsp40) member C7                        | -391.026                         |
| <i>TIMM13</i>   | Translocase of inner mitochondrial membrane 13                          | -390.194                         |
| <i>PSMD6</i>    | Proteasome 26S subunit, non-ATPase 6                                    | -380.012                         |
| <i>POLR3H</i>   | RNA polymerase III subunit H                                            | -378.485                         |
| <i>SKP2</i>     | S-phase kinase-associated protein 2                                     | -376.452                         |
| <i>ATP5ME</i>   | ATP synthase membrane subunit e                                         | -371.18                          |
| <i>PSMC4</i>    | Proteasome 26S subunit, ATPase 4                                        | -345.009                         |
| <i>UQCRH</i>    | Ubiquinol-cytochrome c reductase hinge protein                          | -330.192                         |
| <i>SLIRP</i>    | SRA stem loop-interacting RNA-binding protein                           | -330.171                         |
| <i>POLR2L</i>   | RNA polymerase II, I and III subunit L                                  | -315.839                         |
| <i>FH</i>       | Fumarate hydratase                                                      | -315.692                         |
| <i>POLR2J</i>   | RNA polymerase II subunit J                                             | -312.908                         |
| <i>H3C1</i>     | H3-clustered histone 1                                                  | -289.204                         |
| <i>SGTA</i>     | Small glutamine rich tetratricopeptide repeat co-chaperone $\alpha$     | -287.344                         |
| <i>GGCT</i>     | $\gamma$ -Glutamylcyclotransferase                                      | -277.642                         |
| <i>MED21</i>    | Mediator complex subunit 21                                             | -276.1                           |
| <i>TOMM5</i>    | Translocase of outer mitochondrial membrane 5                           | -264.689                         |
| <i>RBM4</i>     | RNA binding motif protein 4                                             | -260.937                         |
| <i>ARPC4</i>    | Actin-related protein 2/3 complex subunit 4                             | -256.843                         |
| <i>PRMT5</i>    | Protein arginine methyltransferase 5                                    | -255.082                         |
| <i>NOP10</i>    | NOP10 ribonucleoprotein                                                 | -242.713                         |
| <i>IMP3</i>     | IMP U3 small nucleolar ribonucleoprotein 3                              | -241.662                         |
| <i>HIGD1A</i>   | HIG1 hypoxia-inducible domain family member 1A                          | -238.727                         |
| <i>MBD2</i>     | Methyl-CpG binding domain protein 2                                     | -236.407                         |
| <i>GLO1</i>     | Glyoxalase I                                                            | -234.15                          |
| <i>PRPF3</i>    | Pre-mRNA processing factor 3                                            | -232.382                         |
| <i>MCRS1</i>    | Microspherule protein 1                                                 | -228.699                         |
| <i>GIMAP6</i>   | GTPase, IMAF family member 6                                            | -227.072                         |
| <i>BCL7B</i>    | BAF chromatin remodeling complex subunit BCL7B                          | -222.003                         |
| <i>TIAL1</i>    | TIA1 cytotoxic granule-associated RNA binding protein-like 1            | -216.678                         |
| <i>POLR2B</i>   | RNA polymerase II subunit B                                             | -212.393                         |

|                      |                                                     |          |
|----------------------|-----------------------------------------------------|----------|
| <i>AKT2</i>          | AKT serine/threonine kinase 2                       | -205.971 |
| <i>SLC39A14</i>      | Solute carrier family 39 member 14                  | -204.958 |
| <i>TSR2</i>          | TSR2 ribosome maturation factor                     | -204.401 |
| <i>VPS26C</i>        | VPS26 endosomal protein sorting factor C            | -201.543 |
| <i>SLC38A5</i>       | Solute carrier family 38 member 5                   | -199.146 |
| <i>CDC23</i>         | Cell division cycle 23                              | -196.17  |
| <i>SNAP29</i>        | Synaptosome-associated protein 29                   | -194.53  |
| <i>PRCC</i>          | Proline-rich mitotic checkpoint control factor      | -194.1   |
| <i>TXNDC17</i>       | Thioredoxin domain-containing 17                    | -193.404 |
| <i>TFB2M</i>         | Transcription factor B2, mitochondrial              | -192.639 |
| <i>ECD</i>           | Ecdysoneless cell cycle regulator                   | -191.991 |
| <i>ESS2</i>          | Ess-2 splicing factor homolog                       | -190.523 |
| <i>NOP14</i>         | NOP14 nucleolar protein                             | -189.579 |
| <i>FBL</i>           | Fibrillarin                                         | -185.399 |
| <i>PRKCSH</i>        | Protein kinase C substrate 80K-H                    | -178.751 |
| <i>TIMM22</i>        | Translocase of inner mitochondrial membrane 22      | -174.109 |
| <i>CLEC11A</i>       | C-type lectin domain-containing 11A                 | -171.233 |
| <i>BOP1</i>          | BOP1 ribosomal biogenesis factor                    | -170.653 |
| <i>SEN3</i>          | SUMO specific peptidase 3                           | -162.169 |
| <i>HMG3</i>          | High mobility group nucleosomal binding domain 3    | -158.5   |
| <i>TARS1</i>         | Threonyl-tRNA synthetase 1                          | -150.394 |
| <i>PLOD1</i>         | Procollagen-lysine,2-oxoglutarate 5-dioxygenase 1   | -150.187 |
| <i>PRX</i>           | Periaxin                                            | -146.378 |
| <i>RIPK1</i>         | Receptor-interacting serine/threonine kinase 1      | -145.21  |
| <i>MIS12</i>         | MIS12 kinetochore complex component                 | -144.341 |
| <i>NAPA</i>          | NSF attachment protein alpha                        | -140.725 |
| <i>CCT6A</i>         | Chaperonin containing TCP1 subunit 6A               | -140.677 |
| <i>SYPL1</i>         | Synaptophysin-like 1                                | -140.605 |
| <i>ABRAXAS2</i>      | Abraxas 2, BRISC complex subunit                    | -140.3   |
| <i>IKZF5</i>         | IKAROS family zinc finger 5                         | -139.584 |
| <i>PPP1R10</i>       | Protein phosphatase 1 regulatory subunit 10         | -137.914 |
| <i>HSP90AB1</i>      | Heat shock protein 90 alpha family class B member 1 | -136.445 |
| <i>CHKA</i>          | Choline kinase $\alpha$                             | -135.811 |
| <i>CHRA1</i>         | Chromatin accessibility complex subunit 1           | -132.085 |
| <i>NCBP1</i>         | Nuclear cap binding protein subunit 1               | -131.961 |
| <i>IFT22</i>         | Intraflagellar transport 22                         | -131.708 |
| <i>USP5</i>          | Ubiquitin-specific peptidase 5                      | -130.705 |
| <i>ZNF672</i>        | Zinc finger protein 672                             | -129.878 |
| <i>BCL11A</i>        | BAF chromatin remodeling complex subunit BCL11A     | -127.513 |
| <i>UBR7</i>          | Ubiquitin protein ligase E3 component n-recogin 7   | -125.692 |
| <i>SPRING1</i>       | SREBF pathway regulator in Golgi 1                  | -125.591 |
| <i>ATG16L1</i>       | Autophagy-related 16-like 1                         | -125.555 |
| <i>MAPKAPK2</i>      | MAPK-activated protein kinase 2                     | -124.144 |
| <i>ST7</i>           | Suppression of tumorigenicity 7                     | -121.841 |
| <i>GPN2</i>          | GPN-loop GTPase 2                                   | -121.82  |
| <i>TOE1</i>          | Target of EGR1, exonuclease                         | -120.285 |
| <i>BCL9</i>          | BCL9 transcription coactivator                      | -119.233 |
| <i>TSPAN7</i>        | Tetraspanin 7                                       | -116.64  |
| <i>SLX1A-SULT1A3</i> | SLX1A-SULT1A3 readthrough (NMD candidate)           | -115.898 |
| <i>CHID1</i>         | Chitinase domain-containing 1                       | -112.854 |

|                     |                                                               |          |
|---------------------|---------------------------------------------------------------|----------|
| <i>ANKS6</i>        | Ankyrin repeat and sterile $\alpha$ motif domain-containing 6 | -112.21  |
| <i>FOXO3</i>        | Forkhead box O3                                               | -111.784 |
| <i>ELP6</i>         | Elongator acetyltransferase complex subunit 6                 | -110.671 |
| <i>DNM2</i>         | Dynamin 2                                                     | -110.671 |
| <i>CD151</i>        | CD151 molecule (Raph blood group)                             | -110.061 |
| <i>PMM2</i>         | Phosphomannomutase 2                                          | -108.248 |
| <i>LOC107987373</i> | 39S ribosomal protein L23, mitochondrial                      | -108.088 |
| <i>TOR1AIP2</i>     | Torsin 1A-interacting protein 2                               | -107.437 |
| <i>SFXN5</i>        | Sideroflexin 5                                                | -106.865 |
| <i>SLC35B4</i>      | Solute carrier family 35 member B4                            | -106.326 |
| <i>TMEM104</i>      | Transmembrane protein 104                                     | -106.045 |
| <i>DHX15</i>        | DEAH-box helicase 15                                          | -101.834 |
| <i>RNF185</i>       | Ring finger protein 185                                       | -101.731 |
| <i>ZDHHC7</i>       | Zinc finger DHHC-type palmitoyltransferase 7                  | -99.753  |
| <i>AP3B1</i>        | Adaptor-related protein complex 3 subunit $\beta$ 1           | -99.31   |
| <i>PUS1</i>         | Pseudouridine synthase 1                                      | -99.052  |
| <i>BRMS1</i>        | BRMS1 transcriptional repressor and anoikis regulator         | -97.909  |
| <i>FBLN2</i>        | Fibulin 2                                                     | -97.847  |
| <i>ZNF317</i>       | Zinc finger protein 317                                       | -97.834  |
| <i>TMEM185A</i>     | Transmembrane protein 185A                                    | -96.499  |
| <i>POLR3K</i>       | RNA polymerase III subunit K                                  | -95.872  |
| <i>HYOU1</i>        | Hypoxia-upregulated 1                                         | -95.303  |
| <i>AFMID</i>        | Arylformamidase                                               | -95.271  |
| <i>ABCF2</i>        | ATP-binding cassette subfamily F member 2                     | -94.311  |
| <i>RAI1</i>         | Retinoic acid-induced 1                                       | -93.834  |
| <i>TNFRSF14-AS1</i> | TNFRSF14 antisense RNA 1                                      | -93.019  |
| <i>STK32C</i>       | Serine/threonine kinase 32C                                   | -91.713  |
| <i>HS6ST1</i>       | Heparan sulfate 6-O-sulfotransferase 1                        | -90.21   |
| <i>AHDC1</i>        | AT-hook DNA binding motif-containing 1                        | -89.51   |
| <i>KIF3B</i>        | Kinesin family member 3B                                      | -87.485  |
| <i>CSRNP2</i>       | Cysteine- and serine-rich nuclear protein 2                   | -86.996  |
| <i>ASF1B</i>        | Anti-silencing function 1B histone chaperone                  | -85.769  |
| <i>PRR3</i>         | Proline-rich 3                                                | -85.707  |
| <i>SF3B3</i>        | Splicing factor 3b subunit 3                                  | -85.667  |
| <i>ANAPC2</i>       | Anaphase-promoting complex subunit 2                          | -85.008  |
| <i>AMH</i>          | Anti-Mullerian hormone                                        | -84.671  |
| <i>ARHGAP27</i>     | Rho GTPase-activating protein 27                              | -84.02   |
| <i>B4GALNT1</i>     | $\beta$ -1,4-N-acetyl-galactosaminyltransferase 1             | -83.727  |
| <i>ZFYVE27</i>      | Zinc finger FYVE-type-containing 27                           | -83.455  |
| <i>FBXO9</i>        | F-box protein 9                                               | -83.212  |
| <i>ADCY3</i>        | Adenylate cyclase 3                                           | -82.795  |
| <i>PTGDR2</i>       | Prostaglandin D2 receptor 2                                   | -81.399  |
| <i>TXNL4A</i>       | Thioredoxin like 4A                                           | -81.187  |
| <i>ELOF1</i>        | Elongation factor 1 homolog                                   | -79.966  |
| <i>EXOSC10</i>      | Exosome component 10                                          | -76.678  |
| <i>L3MBTL2</i>      | L3MBTL histone methyl-lysine binding protein 2                | -74.95   |
| <i>SLC25A39</i>     | Solute carrier family 25 member 39                            | -74.914  |
| <i>IQSEC1</i>       | IQ motif and Sec7 domain ArfGEF 1                             | -74.844  |
| <i>CDKN2B</i>       | Cyclin-dependent kinase inhibitor 2B                          | -72.444  |
| <i>WRN</i>          | WRN RecQ-like helicase                                        | 71.17    |

|                     |                                                         |         |
|---------------------|---------------------------------------------------------|---------|
| <i>NAPB</i>         | NSF attachment protein $\beta$                          | 71.336  |
| <i>FAM8A1</i>       | Family with sequence similarity 8 member A1             | 72.726  |
| <i>LINC00869</i>    | Long intergenic non-protein coding RNA 869              | 73.366  |
| <i>EFCAB2</i>       | EF-hand calcium-binding domain 2                        | 73.697  |
| <i>U2AF1L4</i>      | U2 small nuclear RNA auxiliary factor 1-like 4          | 74.23   |
| <i>CSGALNACT2</i>   | Chondroitin sulfate N-acetylgalactosaminyltransferase 2 | 74.263  |
| <i>MAN1A1</i>       | Mannosidase $\alpha$ class 1A member 1                  | 74.305  |
| <i>LCN1</i>         | Lipocalin 1                                             | 75.07   |
| <i>CACFD1</i>       | Calcium channel flower domain-containing 1              | 76.61   |
| <i>CD38</i>         | CD38 molecule                                           | 76.717  |
| <i>ENGASE</i>       | Endo- $\beta$ -N-acetylglucosaminidase                  | 78.287  |
| <i>TMEM168</i>      | Transmembrane protein 168                               | 78.56   |
| <i>LCMT1</i>        | Leucine carboxyl methyltransferase 1                    | 78.723  |
| <i>NR6A1</i>        | Nuclear receptor subfamily 6 group A member 1           | 79.988  |
| <i>STN1</i>         | STN1 subunit of CST complex                             | 81.089  |
| <i>ANKRD20A4P</i>   | Ankyrin repeat domain 20 family member A3, pseudogene   | 81.324  |
| <i>HEATR6</i>       | HEAT repeat-containing 6                                | 81.344  |
| <i>TMEM30A</i>      | Transmembrane protein 30A                               | 81.702  |
| <i>BORA</i>         | BORA aurora kinase A activator                          | 83.845  |
| <i>SH3GLB1</i>      | SH3 domain-containing GRB2-like, endophilin B1          | 84.86   |
| <i>REEP5</i>        | Receptor accessory protein 5                            | 85.025  |
| <i>HMGCL</i>        | 3-Hydroxy-3-methylglutaryl-CoA lyase                    | 85.573  |
| <i>TNFAIP8</i>      | TNF $\alpha$ -induced protein 8                         | 85.886  |
| <i>SLC14A1</i>      | Solute carrier family 14 member 1 (Kidd blood group)    | 85.971  |
| <i>METTL22</i>      | Methyltransferase like 22                               | 85.982  |
| <i>MARCKS</i>       | Myristoylated alanine-rich protein kinase C substrate   | 86.112  |
| <i>MACIR</i>        | Macrophage immunometabolism regulator                   | 86.192  |
| <i>LRRC20</i>       | Leucine-rich repeat-containing 20                       | 87.422  |
| <i>RAB44</i>        | RAB44, member RAS oncogene family                       | 89.843  |
| <i>FANCF</i>        | FA complementation group F                              | 90.573  |
| <i>SUPT20HL2</i>    | SUPT20H-like 2                                          | 91.542  |
| <i>PPP2R5A</i>      | Protein phosphatase 2 regulatory subunit B' $\alpha$    | 91.69   |
| <i>DENND3</i>       | DENN domain-containing 3                                | 91.813  |
| <i>DDX60</i>        | DExD/H-box helicase 60                                  | 93.808  |
| <i>STX16-NPEPL1</i> | STX16-NPEPL1 readthrough (NMD candidate)                | 93.87   |
| <i>CXorf65</i>      | Chromosome X open reading frame 65                      | 94.625  |
| <i>WDR27</i>        | WD repeat domain 27                                     | 95.287  |
| <i>MCUR1</i>        | Mitochondrial calcium uniporter regulator 1             | 95.382  |
| <i>IL10RB</i>       | Interleukin 10 receptor subunit $\beta$                 | 97.649  |
| <i>HMG20A</i>       | High mobility group 20A                                 | 97.722  |
| <i>ABHD10</i>       | Abhydrolase domain-containing 10, depalmitoylase        | 97.887  |
| <i>CPSF2</i>        | Cleavage- and polyadenylation-specific factor 2         | 98.271  |
| <i>SUGP2</i>        | SURP and G-patch domain-containing 2                    | 98.564  |
| <i>GCLM</i>         | Glutamate-cysteine ligase modifier subunit              | 98.944  |
| <i>BAZ1A</i>        | Bromodomain adjacent to zinc finger domain 1A           | 99.427  |
| <i>STIL</i>         | STIL centriolar assembly protein                        | 100.531 |
| <i>PTP4A3</i>       | Protein tyrosine phosphatase 4A3                        | 101.141 |
| <i>C16orf87</i>     | Chromosome 16 open reading frame 87                     | 101.263 |
| <i>ABHD13</i>       | Abhydrolase domain-containing 13                        | 101.298 |
| <i>NACA</i>         | Nascent polypeptide-associated complex subunit $\alpha$ | 101.743 |

|                       |                                                               |         |
|-----------------------|---------------------------------------------------------------|---------|
| <i>TENT2</i>          | Terminal nucleotidyltransferase 2                             | 103.956 |
| <i>TMBIM4</i>         | Transmembrane BAX inhibitor motif-containing 4                | 103.958 |
| <i>TMEM87B</i>        | Transmembrane protein 87B                                     | 104.158 |
| <i>MED14</i>          | Mediator complex subunit 14                                   | 105.199 |
| <i>MLH1</i>           | mutL homolog 1                                                | 105.427 |
| <i>HCFC2</i>          | Host cell factor C2                                           | 106.566 |
| <i>RIMKLB</i>         | Ribosomal modification protein rimK-like family member B      | 106.743 |
| <i>SNX16</i>          | Sorting nexin 16                                              | 106.933 |
| <i>DPP8</i>           | Dipeptidyl peptidase 8                                        | 107.017 |
| <i>CYSLTR1</i>        | Cysteinyl leukotriene receptor 1                              | 107.203 |
| <i>FOXN2</i>          | Forkhead box N2                                               | 107.26  |
| <i>RASA1</i>          | RAS p21 protein activator 1                                   | 108.176 |
| <i>DOCK11</i>         | Dedicator of cytokinesis 11                                   | 109.51  |
| <i>FAM193A</i>        | Family with sequence similarity 193 member A                  | 111.941 |
| <i>EXPH5</i>          | Exophilin 5                                                   | 112.988 |
| <i>HLCS</i>           | Holocarboxylase synthetase                                    | 114.492 |
| <i>SEC24A</i>         | SEC24 homolog A, COPII coat complex component                 | 114.939 |
| <i>USP9X</i>          | Ubiquitin specific peptidase 9 X-linked                       | 115.068 |
| <i>PRKCI</i>          | Protein kinase C $\iota$                                      | 117.58  |
| <i>INTS12</i>         | Integrator complex subunit 12                                 | 117.858 |
| <i>KANK3</i>          | KN motif and ankyrin repeat domains 3                         | 118.255 |
| <i>SPG11</i>          | SPG11 vesicle trafficking-associated, spatacsin               | 118.942 |
| <i>FAHD2A</i>         | Fumarylacetoacetate hydrolase domain-containing 2A            | 119.981 |
| <i>ABHD18</i>         | Abhydrolase domain-containing 18                              | 120.788 |
| <i>LYRM7</i>          | LYR motif-containing 7                                        | 122.308 |
| <i>CCNT1</i>          | Cyclin T1                                                     | 124.051 |
| <i>SUMO2</i>          | Small ubiquitin-like modifier 2                               | 124.082 |
| <i>CENPC</i>          | Centromere protein C                                          | 124.282 |
| <i>TATDN3</i>         | TatD DNase domain-containing 3                                | 124.482 |
| <i>AP1S2</i>          | Adaptor-related protein complex 1 subunit $\sigma$ 2          | 124.79  |
| <i>GIT2</i>           | GIT ArfGAP 2                                                  | 125.219 |
| <i>TPD52</i>          | Tumor protein D52                                             | 125.326 |
| <i>PPIE</i>           | Peptidylprolyl isomerase E                                    | 127.464 |
| <i>NLN</i>            | Neurolysin                                                    | 129.273 |
| <i>ZNF816-ZNF321P</i> | ZNF816-ZNF321P readthrough                                    | 129.648 |
| <i>EDEM3</i>          | ER degradation enhancing $\alpha$ -mannosidase-like protein 3 | 130.569 |
| <i>EIF5A2</i>         | Eukaryotic translation initiation factor 5A2                  | 131.707 |
| <i>MSH5</i>           | mutS homolog 5                                                | 132.54  |
| <i>PDCD4</i>          | Programmed cell death 4                                       | 133.13  |
| <i>TRIM59</i>         | Tripartite motif-containing 59                                | 134.562 |
| <i>UCHL3</i>          | Ubiquitin C-terminal hydrolase L3                             | 135.375 |
| <i>SPINT2</i>         | Serine peptidase inhibitor, Kunitz-type 2                     | 138.421 |
| <i>MIS18A</i>         | MIS18 kinetochore protein A                                   | 138.69  |
| <i>NCK1</i>           | NCK adaptor protein 1                                         | 138.925 |
| <i>TMEM106B</i>       | Transmembrane protein 106B                                    | 139.132 |
| <i>SDHAF4</i>         | Succinate dehydrogenase complex assembly factor 4             | 140.279 |
| <i>CAST</i>           | Calpastatin                                                   | 141.739 |
| <i>NFATC2</i>         | Nuclear factor of activated T cells 2                         | 145.285 |
| <i>RAB8B</i>          | RAB8B, member RAS oncogene family                             | 146.196 |

|                 |                                                                         |         |
|-----------------|-------------------------------------------------------------------------|---------|
| <i>ARHGAP5</i>  | Rho GTPase activating protein 5                                         | 147.266 |
| <i>LRRC8D</i>   | Leucine-rich repeat-containing 8 VRAC subunit D                         | 147.869 |
| <i>MARCHF7</i>  | Membrane associated ring CH-type finger 7                               | 148.89  |
| <i>MNAT1</i>    | MNAT1 component of CDK activating kinase                                | 149.97  |
| <i>SAMD9</i>    | Sterile $\alpha$ motif domain-containing 9                              | 151.835 |
| <i>EXOSC8</i>   | Exosome component 8                                                     | 152.27  |
| <i>EIF3A</i>    | Eukaryotic translation initiation factor 3 subunit A                    | 153.724 |
| <i>SPIN1</i>    | Spindlin 1                                                              | 153.82  |
| <i>FHIP2A</i>   | FHF complex subunit HOOK-interacting protein 2A                         | 154.286 |
| <i>NEK2</i>     | NIMA-related kinase 2                                                   | 157.207 |
| <i>AIDA</i>     | Axin interactor, dorsalization-associated                               | 157.22  |
| <i>MSGN1</i>    | Mesogenin 1                                                             | 159.898 |
| <i>ZNF280D</i>  | Zinc finger protein 280D                                                | 161.461 |
| <i>MTFMT</i>    | Mitochondrial methionyl-tRNA formyltransferase                          | 162.111 |
| <i>ARPC3</i>    | Actin-related protein 2/3 complex subunit 3                             | 163.55  |
| <i>DDX50</i>    | DExD-box helicase 50                                                    | 165.167 |
| <i>NPEPL1</i>   | Aminopeptidase-like 1                                                   | 165.386 |
| <i>PICALM</i>   | Phosphatidylinositol-binding clathrin assembly protein                  | 165.577 |
| <i>CD53</i>     | CD53 molecule                                                           | 168.629 |
| <i>GINM1</i>    | Glycoprotein integral membrane 1                                        | 169.79  |
| <i>EPRS1</i>    | Glutamyl-prolyl-tRNA synthetase 1                                       | 170.902 |
| <i>ELMO2</i>    | Engulfment and cell motility 2                                          | 171.041 |
| <i>MOCS2</i>    | Molybdenum cofactor synthesis 2                                         | 172.192 |
| <i>LNPEP</i>    | Leucyl and cystinyl aminopeptidase                                      | 174.1   |
| <i>C5orf22</i>  | Chromosome 5 open reading frame 22                                      | 174.924 |
| <i>CLPX</i>     | Caseinolytic mitochondrial matrix peptidase chaperone subunit X         | 176.265 |
| <i>ZRANB2</i>   | Zinc finger RANBP2-type-containing 2                                    | 177.924 |
| <i>COG6</i>     | Component of oligomeric Golgi complex 6                                 | 178.308 |
| <i>RTN4</i>     | Reticulon 4                                                             | 185.407 |
| <i>CNIH1</i>    | Cornichon family AMPA receptor auxiliary protein 1                      | 185.821 |
| <i>COPB1</i>    | COPI coat complex subunit $\beta$ 1                                     | 191.712 |
| <i>TARBP1</i>   | TAR (HIV-1) RNA-binding protein 1                                       | 194.064 |
| <i>LCE1C</i>    | Late cornified envelope 1C                                              | 204.749 |
| <i>TUBG2</i>    | Tubulin $\gamma$ 2                                                      | 205.397 |
| <i>TCAIM</i>    | T cell activation inhibitor, mitochondrial                              | 211.119 |
| <i>DFFA</i>     | DNA fragmentation factor subunit $\alpha$                               | 211.338 |
| <i>SEL1L3</i>   | SEL1L family member 3                                                   | 213.03  |
| <i>PHF20</i>    | PHD finger protein 20                                                   | 213.052 |
| <i>OSGIN2</i>   | Oxidative stress-induced growth inhibitor family member 2               | 213.386 |
| <i>GOLGA8T</i>  | Golgin A8 family member T                                               | 216.317 |
| <i>FAM86B1</i>  | Family with sequence similarity 86 member B1                            | 219.993 |
| <i>HCLS1</i>    | Hematopoietic cell-specific Lyn substrate 1                             | 220.254 |
| <i>MDM4</i>     | MDM4 regulator of p53                                                   | 220.422 |
| <i>IFRD1</i>    | Interferon-related developmental regulator 1                            | 224.495 |
| <i>SH2D1A</i>   | SH2 domain-containing 1A                                                | 225.236 |
| <i>AIMP1</i>    | Aminoacyl tRNA synthetase complex-interacting multifunctional protein 1 | 226.88  |
| <i>CCNB1IP1</i> | Cyclin B1-interacting protein 1                                         | 235.862 |
| <i>PIAS1</i>    | Protein inhibitor of activated STAT 1                                   | 236.804 |

|                  |                                                                |          |
|------------------|----------------------------------------------------------------|----------|
| <i>CDKN3</i>     | Cyclin-dependent kinase inhibitor 3                            | 239.766  |
| <i>ARRDC3</i>    | Arrestin domain-containing 3                                   | 243.376  |
| <i>BLZF1</i>     | Basic leucine zipper nuclear factor 1                          | 248.504  |
| <i>ARFGAP3</i>   | ADP ribosylation factor GTPase-activating protein 3            | 250.63   |
| <i>HDGF</i>      | Heparin-binding growth factor                                  | 262.287  |
| <i>IBTK</i>      | Inhibitor of Bruton tyrosine kinase                            | 262.403  |
| <i>RNPEP</i>     | Arginyl aminopeptidase                                         | 264.07   |
| <i>CHST11</i>    | Carbohydrate sulfotransferase 11                               | 266.767  |
| <i>PGRMC2</i>    | Progesterone receptor membrane component 2                     | 268.332  |
| <i>PRKRA</i>     | Protein activator of interferon-induced protein kinase EIF2AK2 | 277.993  |
| <i>TUT7</i>      | Terminal uridylyl transferase 7                                | 283.322  |
| <i>TSG101</i>    | Tumor susceptibility 101                                       | 285.937  |
| <i>VIM</i>       | Vimentin                                                       | 290.791  |
| <i>CCDC88A</i>   | Coiled-coil domain-containing 88A                              | 302.785  |
| <i>IMPA1</i>     | Inositol monophosphatase 1                                     | 309.746  |
| <i>H2AZ2</i>     | H2A.Z variant histone 2                                        | 315.471  |
| <i>TMEM179B</i>  | Transmembrane protein 179B                                     | 315.863  |
| <i>IFI27L1</i>   | Interferon $\alpha$ inducible protein 27-like 1                | 327.252  |
| <i>ICA1</i>      | Islet cell autoantigen 1                                       | 338.459  |
| <i>TUBE1</i>     | Tubulin $\epsilon$ 1                                           | 339.814  |
| <i>CLDND1</i>    | Claudin domain-containing 1                                    | 344.32   |
| <i>UBA3</i>      | Ubiquitin-like modifier-activating enzyme 3                    | 361.52   |
| <i>SNRPA1</i>    | Small nuclear ribonucleoprotein polypeptide A'                 | 401.878  |
| <i>CD3D</i>      | CD3d molecule                                                  | 405.906  |
| <i>THAP9-AS1</i> | THAP9 antisense RNA 1                                          | 414.691  |
| <i>PTBP3</i>     | Polypyrimidine tract binding protein 3                         | 423.094  |
| <i>USP11</i>     | Ubiquitin-specific peptidase 11                                | 445.03   |
| <i>ZEB1</i>      | Zinc finger E-box-binding homeobox 1                           | 475.977  |
| <i>TPT1</i>      | Tumor protein, translationally-controlled 1                    | 529.088  |
| <i>SNX5</i>      | Sorting nexin 5                                                | 558.026  |
| <i>HSPA9</i>     | Heat shock protein family A (Hsp70) member 9                   | 561.504  |
| <i>IDI1</i>      | Isopentenyl-diphosphate delta isomerase 1                      | 624.931  |
| <i>SNHG32</i>    | Small nucleolar RNA host gene 32                               | 728.082  |
| <i>ASNS</i>      | Asparagine synthetase (glutamine-hydrolyzing)                  | 864.481  |
| <i>RAD21</i>     | RAD21 cohesin complex component                                | 978.419  |
| <i>TMBIM6</i>    | Transmembrane BAX inhibitor motif-containing 6                 | 983.752  |
| <i>HMGCS1</i>    | 3-hydroxy-3-methylglutaryl-CoA synthase 1                      | 1187.922 |



**Supplementary Table S2:** Deregulated gene expression upon treatment of MDA-MB-231-pcDNA3 breast cancer cells with the IC<sub>50</sub> concentration of ZINC15675948 for 24 h.

| Symbol          | Gene name                                                                       | Fold change of expression |
|-----------------|---------------------------------------------------------------------------------|---------------------------|
| <i>H4C3</i>     | H4-clustered histone 3                                                          | -1097.46                  |
| <i>CALR</i>     | Calreticulin                                                                    | -786.152                  |
| <i>TOP2A</i>    | DNA topoisomerase II $\alpha$                                                   | -747.107                  |
| <i>H2AC13</i>   | H2A-clustered histone 13                                                        | -707.585                  |
| <i>ARL6IP1</i>  | ADP ribosylation factor-like GTPase 6-interacting protein 1                     | -648.657                  |
| <i>DHFR</i>     | Dihydrofolate reductase                                                         | -545.609                  |
| <i>H2BC18</i>   | H2B-clustered histone 18                                                        | -506.868                  |
| <i>UBC</i>      | Ubiquitin C                                                                     | -503.295                  |
| <i>SCD</i>      | Stearoyl-CoA desaturase                                                         | -496.162                  |
| <i>MYH9</i>     | Myosin heavy chain 9                                                            | -495.637                  |
| <i>LAMB3</i>    | Laminin subunit $\beta$ 3                                                       | -489.462                  |
| <i>H4C11</i>    | H4-clustered histone 11                                                         | -468.663                  |
| <i>PLAU</i>     | Plasminogen activator, urokinase                                                | -434.661                  |
| <i>CSE1L</i>    | Chromosome segregation 1-like                                                   | -425.176                  |
| <i>CBX5</i>     | Chromobox 5                                                                     | -420.682                  |
| <i>FAM83D</i>   | Family with sequence similarity 83 member D                                     | -410.028                  |
| <i>CTSB</i>     | Cathepsin B                                                                     | -398.833                  |
| <i>MCL1</i>     | MCL1 apoptosis regulator, BCL2 family member                                    | -388.41                   |
| <i>MORF4L1</i>  | Mortality factor 4-like 1                                                       | -361.289                  |
| <i>DPY19L1</i>  | Dpy-19-like C-mannosyltransferase 1                                             | -359.667                  |
| <i>RAB31</i>    | RAB31, member RAS oncogene family                                               | -349.893                  |
| <i>ADGRF5</i>   | Adhesion G protein-coupled receptor F5                                          | -346.867                  |
| <i>TUBB4A</i>   | Tubulin $\beta$ 4A class IVa                                                    | -343.719                  |
| <i>SLC30A9</i>  | Solute carrier family 30 member 9                                               | -328.453                  |
| <i>DUT</i>      | Deoxyuridine triphosphatase                                                     | -327.3                    |
| <i>FBL</i>      | Fibrillarin                                                                     | -325.331                  |
| <i>NUCKS1</i>   | Nuclear casein kinase and cyclin-dependent kinase substrate 1                   | -324.544                  |
| <i>SAMHD1</i>   | SAM and HD domain-containing deoxynucleoside triphosphate triphosphohydrolase 1 | -310.46                   |
| <i>CPNE8</i>    | Copine 8                                                                        | -300.725                  |
| <i>LTA4H</i>    | Leukotriene A4 hydrolase                                                        | -288.132                  |
| <i>HYOU1</i>    | Hypoxia-upregulated 1                                                           | -264.062                  |
| <i>SPRY1</i>    | Sprouty RTK signaling antagonist 1                                              | -258.877                  |
| <i>DNMBP</i>    | Dynamin-binding protein                                                         | -252.625                  |
| <i>PDIA6</i>    | Protein disulfide isomerase family A member 6                                   | -251.66                   |
| <i>SURF4</i>    | Surfeit 4                                                                       | -247.503                  |
| <i>MOB1A</i>    | MOB kinase activator 1A                                                         | -246.226                  |
| <i>GALNT10</i>  | Polypeptide N-acetylgalactosaminyltransferase 10                                | -234.075                  |
| <i>ABCD3</i>    | ATP-binding cassette subfamily D member 3                                       | -233.045                  |
| <i>PTBP1</i>    | Polypyrimidine tract binding protein 1                                          | -228.707                  |
| <i>SLCO4C1</i>  | Solute carrier organic anion transporter family member 4C1                      | -224.322                  |
| <i>ARHGAP29</i> | Rho GTPase-activating protein 29                                                | -220.073                  |
| <i>UACA</i>     | Uveal autoantigen with coiled-coil domains and ankyrin repeats                  | -217.66                   |

|                 |                                                                                |          |
|-----------------|--------------------------------------------------------------------------------|----------|
| <i>YWHAB</i>    | Tyrosine 3-monooxygenase/tryptophan 5-monooxygenase activation protein $\beta$ | -217.607 |
| <i>STK17A</i>   | Serine/threonine kinase 17a                                                    | -215.483 |
| <i>PRPF8</i>    | Pre-mRNA-processing factor 8                                                   | -210.087 |
| <i>STAU2</i>    | Staufen double-stranded RNA binding protein 2                                  | -206.656 |
| <i>WEE1</i>     | WEE1 G2 checkpoint kinase                                                      | -199.398 |
| <i>KNL1</i>     | Kinetochore scaffold 1                                                         | -198.563 |
| <i>CRIPT</i>    | CXXC repeat containing interactor of PDZ3 domain                               | -197.78  |
| <i>ATP5F1C</i>  | ATP synthase F1 subunit $\gamma$                                               | -188.806 |
| <i>SRSF6</i>    | Serine- and arginine-rich splicing factor 6                                    | -184.144 |
| <i>SORT1</i>    | Sortilin 1                                                                     | -182.36  |
| <i>POGLUT3</i>  | Protein O-glucosyltransferase 3                                                | -180.049 |
| <i>TMTC3</i>    | Transmembrane O-mannosyltransferase targeting cadherins 3                      | -178.812 |
| <i>CENPI</i>    | Centromere protein I                                                           | -175.693 |
| <i>TMEM156</i>  | Transmembrane protein 156                                                      | -169.921 |
| <i>FDPS</i>     | Farnesyl diphosphate synthase                                                  | -168.581 |
| <i>AKT2</i>     | AKT serine/threonine kinase 2                                                  | -164.96  |
| <i>GOLIM4</i>   | Golgi integral membrane protein 4                                              | -161.132 |
| <i>DIAPH3</i>   | Diaphanous-related formin 3                                                    | -158.056 |
| <i>RFC3</i>     | Replication factor C subunit 3                                                 | -156.621 |
| <i>EDEM3</i>    | ER degradation enhancing $\alpha$ -mannosidase-like protein 3                  | -156.105 |
| <i>CHRA1</i>    | Chromatin accessibility complex subunit 1                                      | -155.619 |
| <i>MAGI1</i>    | Membrane-associated guanylate kinase, WW and PDZ domain-containing 1           | -154.971 |
| <i>POLR2K</i>   | RNA polymerase II, I and III subunit K                                         | -154.954 |
| <i>AMIGO2</i>   | Adhesion molecule with Ig like domain 2                                        | -149.367 |
| <i>TGOLN2</i>   | Trans-Golgi network protein 2                                                  | -143.607 |
| <i>LNPEP</i>    | Leucyl and cystinyl aminopeptidase                                             | -142.927 |
| <i>PLOD2</i>    | Procollagen-lysine,2-oxoglutarate 5-dioxygenase 2                              | -141.146 |
| <i>PYGB</i>     | Glycogen phosphorylase B                                                       | -138.181 |
| <i>CD151</i>    | CD151 molecule (Raph blood group)                                              | -136.351 |
| <i>MED31</i>    | Mediator complex subunit 31                                                    | -135.623 |
| <i>RAB10</i>    | RAB10, member RAS oncogene family                                              | -128.945 |
| <i>ASPM</i>     | Assembly factor for spindle microtubules                                       | -128.634 |
| <i>H2BC15</i>   | H2B-clustered histone 15                                                       | -128.102 |
| <i>TRIM25</i>   | Tripartite motif-containing 25                                                 | -127.719 |
| <i>ANKRD36C</i> | Ankyrin repeat domain 36C                                                      | -126.06  |
| <i>GFPT2</i>    | Glutamine-fructose-6-phosphate transaminase 2                                  | -125.366 |
| <i>SLC37A4</i>  | Solute carrier family 37 member 4                                              | -120.177 |
| <i>DSG2</i>     | Desmoglein 2                                                                   | -118.543 |
| <i>ABR</i>      | ABR activator of RhoGEF and GTPase                                             | -110.982 |
| <i>LIN7C</i>    | Lin-7 homolog C, crumbs cell polarity complex component                        | -108.677 |
| <i>PARP14</i>   | Poly(ADP-ribose) polymerase family member 14                                   | -107.404 |
| <i>FZD6</i>     | Frizzled class receptor 6                                                      | -106.219 |
| <i>PCGF3</i>    | Polycomb group ring finger 3                                                   | -106.034 |
| <i>HAP1</i>     | Huntingtin-associated protein 1                                                | -104.383 |
| <i>CHRNA5</i>   | Cholinergic receptor nicotinic $\alpha$ 5 subunit                              | -102.973 |
| <i>SNX14</i>    | Sorting nexin 14                                                               | -100.057 |
| <i>GPD2</i>     | Glycerol-3-phosphate dehydrogenase 2                                           | -96.261  |
| <i>PIK3R2</i>   | Phosphoinositide-3-kinase regulatory subunit 2                                 | -96.17   |

|                 |                                                      |         |
|-----------------|------------------------------------------------------|---------|
| <i>MND1</i>     | Meiotic nuclear divisions 1                          | -96.055 |
| <i>MED16</i>    | Mediator complex subunit 16                          | -95.558 |
| <i>CASD1</i>    | CAS1 domain-containing 1                             | -87.454 |
| <i>RASSF7</i>   | Ras association domain family member 7               | -86.107 |
| <i>DCAF7</i>    | DDB1- and CUL4-associated factor 7                   | -85.957 |
| <i>ENY2</i>     | ENY2 transcription and export complex 2 subunit      | -85.938 |
| <i>SMC1A</i>    | Structural maintenance of chromosomes 1A             | -79.591 |
| <i>CPNE7</i>    | Copine 7                                             | -78.336 |
| <i>DNAJC4</i>   | DnaJ heat shock protein family (Hsp40) member C4     | -77.829 |
| <i>TMEM185B</i> | Transmembrane protein 185B                           | -77.068 |
| <i>EPHB2</i>    | EPH receptor B2                                      | -76.939 |
| <i>FBXL17</i>   | F-box and leucine-rich repeat protein 17             | -76.847 |
| <i>SPC25</i>    | SPC25 component of NDC80 kinetochore complex         | -76.43  |
| <i>KAT2B</i>    | Lysine acetyltransferase 2B                          | -76.299 |
| <i>DDX58</i>    | DExD/H-box helicase 58                               | -75.809 |
| <i>MICU2</i>    | Mitochondrial calcium uptake 2                       | -75.698 |
| <i>DAP</i>      | Death-associated protein                             | -74.386 |
| <i>ASF1B</i>    | Anti-silencing function 1B histone chaperone         | -73.008 |
| <i>HGSNAT</i>   | Heparan- $\alpha$ -glucosaminide N-acetyltransferase | -71.105 |
| <i>ZNF780B</i>  | Zinc finger protein 780B                             | -70.864 |
| <i>EXT2</i>     | Exostosin glycosyltransferase 2                      | -70.778 |
| <i>ZNF91</i>    | Zinc finger protein 91                               | -70.133 |
| <i>USP48</i>    | Ubiquitin-specific peptidase 48                      | -69.95  |
| <i>FKBP9</i>    | FKBP prolyl isomerase 9                              | -69.34  |
| <i>KLF2</i>     | Kruppel-like factor 2                                | -68.74  |
| <i>DDX17</i>    | DEAD-box helicase 17                                 | -68.192 |
| <i>LY6E</i>     | Lymphocyte antigen 6 family member E                 | -67.501 |
| <i>SIPA1L1</i>  | Signal-induced proliferation-associated 1-like 1     | -67.432 |
| <i>SLC25A1</i>  | Solute carrier family 25 member 1                    | -67.186 |
| <i>DHRS11</i>   | Dehydrogenase/reductase 11                           | -67.075 |
| <i>BAD</i>      | BCL2-associated agonist of cell death                | -63.458 |
| <i>CCNF</i>     | Cyclin F                                             | -61.653 |
| <i>CYP2R1</i>   | Cytochrome P450 family 2 subfamily R member 1        | -61.464 |
| <i>PCNX3</i>    | Pecanex 3                                            | -60.807 |
| <i>KIF15</i>    | Kinesin family member 15                             | -60.387 |
| <i>H3C3</i>     | H3-clustered histone 3                               | -60.076 |
| <i>SEN2</i>     | SUMO-specific peptidase 2                            | -59.953 |
| <i>BMPR1A</i>   | Bone morphogenetic protein receptor type 1A          | -59.627 |
| <i>DSN1</i>     | DSN1 component of MIS12 kinetochore complex          | -59.349 |
| <i>TST</i>      | Thiosulfate sulfurtransferase                        | -59.232 |
| <i>SURF1</i>    | SURF1 cytochrome c oxidase assembly factor           | -58.863 |
| <i>MTA3</i>     | Metastasis-associated 1 family member 3              | -58.763 |
| <i>APMAP</i>    | Adipocyte plasma membrane-associated protein         | -58.116 |
| <i>B3GALT6</i>  | $\beta$ -1,3-galactosyltransferase 6                 | -55.707 |
| <i>EIF5A2</i>   | Eukaryotic translation initiation factor 5A2         | 55.297  |
| <i>ELOF1</i>    | Elongation factor 1 homolog                          | 55.803  |
| <i>FDX2</i>     | Ferredoxin 2                                         | 55.901  |
| <i>H2BC4</i>    | H2B-clustered histone 4                              | 57.311  |
| <i>ZNF35</i>    | Zinc finger protein 35                               | 58.327  |
| <i>TPM2</i>     | Tropomyosin 2                                        | 58.432  |

|                      |                                                                                |        |
|----------------------|--------------------------------------------------------------------------------|--------|
| <i>DDB2</i>          | Damage-specific DNA binding protein 2                                          | 58.899 |
| <i>TMEM39A</i>       | Transmembrane protein 39A                                                      | 59.07  |
| <i>FNIP2</i>         | Folliculin-interacting protein 2                                               | 59.609 |
| <i>TRIP12</i>        | Thyroid hormone receptor interactor 12                                         | 60.762 |
| <i>LGR6</i>          | Leucine-rich repeat containing G protein-coupled receptor 6                    | 61.377 |
| <i>TMEM170A</i>      | Transmembrane protein 170A                                                     | 61.808 |
| <i>CDT1</i>          | Chromatin licensing and DNA replication factor 1                               | 62.022 |
| <i>INPP5D</i>        | Inositol polyphosphate-5-phosphatase D                                         | 62.074 |
| <i>GRAMD1B</i>       | GRAM domain-containing 1B                                                      | 62.997 |
| <i>SUPT6H</i>        | SPT6 homolog, histone chaperone and transcription elongation factor            | 63.263 |
| <i>EPS8L2</i>        | EPS8-like 2                                                                    | 63.862 |
| <i>NKIRAS1</i>       | NFκB inhibitor-interacting Ras-like 1                                          | 64.995 |
| <i>NEK3</i>          | NIMA-related kinase 3                                                          | 65.678 |
| <i>TSPAN12</i>       | Tetraspanin 12                                                                 | 65.83  |
| <i>RMND1</i>         | Required for meiotic nuclear division 1 homolog                                | 65.836 |
| <i>TENT4B</i>        | Terminal nucleotidyltransferase 4B                                             | 66.663 |
| <i>ZKSCAN8</i>       | Zinc finger with KRAB and SCAN domains 8                                       | 67.119 |
| <i>NABP1</i>         | Nucleic acid-binding protein 1                                                 | 67.159 |
| <i>C9orf78</i>       | Chromosome 9 open reading frame 78                                             | 67.299 |
| <i>ZNF224</i>        | Zinc finger protein 224                                                        | 67.643 |
| <i>TRMU</i>          | tRNA mitochondrial 2-thiouridylase                                             | 67.75  |
| <i>MFSD14A</i>       | Major facilitator superfamily domain-containing 14A                            | 68.092 |
| <i>ELAPOR2</i>       | Endosome-lysosome-associated apoptosis and autophagy regulator family member 2 | 68.205 |
| <i>ZNF830</i>        | Zinc finger protein 830                                                        | 69.262 |
| <i>ERN1</i>          | Endoplasmic reticulum to nucleus signaling 1                                   | 69.698 |
| <i>PRRG1</i>         | Proline-rich and Gla domain 1                                                  | 69.737 |
| <i>MAGEA3/MAGEA6</i> | MAGE family member A6                                                          | 70.045 |
| <i>POLR1E</i>        | RNA polymerase I subunit E                                                     | 70.147 |
| <i>THUMPD3</i>       | THUMP domain-containing 3                                                      | 70.912 |
| <i>METTL26</i>       | Methyltransferase-like 26                                                      | 71.309 |
| <i>RNF138</i>        | Ring finger protein 138                                                        | 71.744 |
| <i>ATG14</i>         | Autophagy-related 14                                                           | 74.14  |
| <i>FTSJ1</i>         | FtsJ RNA 2'-O-methyltransferase 1                                              | 75.094 |
| <i>CBFA2T2</i>       | CBFA2/RUNX1 partner transcriptional co-repressor 2                             | 75.199 |
| <i>VCPKMT</i>        | Valosin-containing protein lysine methyltransferase                            | 76.015 |
| <i>WDR70</i>         | WD repeat domain 70                                                            | 76.199 |
| <i>RPIA</i>          | Ribose 5-phosphate isomerase A                                                 | 77.126 |
| <i>GAL</i>           | Galanin and GMAP prepropeptide                                                 | 77.201 |
| <i>AADAT</i>         | Amino adipate aminotransferase                                                 | 78.975 |
| <i>NR6A1</i>         | Nuclear receptor subfamily 6 group A member 1                                  | 80.068 |
| <i>CLK4</i>          | CDC-like kinase 4                                                              | 80.353 |
| <i>CLNS1A</i>        | Chloride nucleotide-sensitive channel 1A                                       | 80.517 |
| <i>HSBP1L1</i>       | Heat shock factor binding protein 1-like 1                                     | 81.27  |
| <i>POLR1H</i>        | RNA polymerase I subunit H                                                     | 81.528 |
| <i>ATXN7</i>         | Ataxin 7                                                                       | 82.02  |
| <i>POLR1D</i>        | RNA polymerase I and III subunit D                                             | 84.109 |
| <i>FEM1C</i>         | Fem-1 homolog C                                                                | 85.033 |

|                 |                                                                  |         |
|-----------------|------------------------------------------------------------------|---------|
| <i>GSTM1</i>    | Glutathione S-transferase $\mu$ 1                                | 85.645  |
| <i>XPNPEP3</i>  | X-Prolyl aminopeptidase 3                                        | 86.14   |
| <i>ZBTB43</i>   | Zinc finger and BTB domain-containing 43                         | 86.175  |
| <i>RPL26L1</i>  | Ribosomal protein L26-like 1                                     | 86.38   |
| <i>SREK1IP1</i> | SREK1-interacting protein 1                                      | 86.863  |
| <i>RBPMS</i>    | RNA-binding protein, mRNA-processing factor                      | 86.998  |
| <i>CCT6A</i>    | Chaperonin-containing TCP1 subunit 6A                            | 87.047  |
| <i>TM4SF19</i>  | Transmembrane 4 L six family member 19                           | 87.855  |
| <i>COIL</i>     | Coilin                                                           | 89.488  |
| <i>NR3C1</i>    | Nuclear receptor subfamily 3 group C member 1                    | 89.823  |
| <i>RRN3</i>     | RRN3 homolog, RNA polymerase I transcription factor              | 89.962  |
| <i>MDK</i>      | Midkine                                                          | 91.067  |
| <i>POU2F1</i>   | POU class 2 homeobox 1                                           | 92.917  |
| <i>ZKSCAN1</i>  | Zinc finger with KRAB and SCAN domains 1                         | 93.135  |
| <i>SHOC2</i>    | SHOC2 leucine-rich repeat scaffold protein                       | 93.549  |
| <i>YIPF5</i>    | Yip1 domain family member 5                                      | 93.577  |
| <i>STX3</i>     | Syntaxin 3                                                       | 94.238  |
| <i>SLU7</i>     | SLU7 homolog, splicing factor                                    | 94.321  |
| <i>MBNL2</i>    | Muscleblind-like splicing regulator 2                            | 94.64   |
| <i>DSP</i>      | Desmoplakin                                                      | 94.944  |
| <i>RNF8</i>     | Ring finger protein 8                                            | 95.095  |
| <i>CEP95</i>    | Centrosomal protein 95                                           | 95.906  |
| <i>UGCG</i>     | UDP-glucose ceramide glucosyltransferase                         | 96.844  |
| <i>VAMP1</i>    | Vesicle-associated membrane protein 1                            | 97.016  |
| <i>RNF7</i>     | Ring finger protein 7                                            | 98.758  |
| <i>INSYN2B</i>  | Inhibitory synaptic factor family member 2B                      | 98.804  |
| <i>KIAA1191</i> | KIAA1191                                                         | 99.37   |
| <i>THG1L</i>    | tRNA-histidine guanylyltransferase 1-like                        | 99.45   |
| <i>KRTAP4-8</i> | Keratin-associated protein 4-8                                   | 100.498 |
| <i>RBBP6</i>    | RB-binding protein 6, ubiquitin ligase                           | 102.24  |
| <i>ZKSCAN5</i>  | Zinc finger with KRAB and SCAN domains 5                         | 102.778 |
| <i>ING1</i>     | Inhibitor of growth family member 1                              | 105.506 |
| <i>AOX1</i>     | Aldehyde oxidase 1                                               | 105.814 |
| <i>IFIT3</i>    | Interferon-induced protein with tetratricopeptide repeats 3      | 106.53  |
| <i>NBPF10</i>   | NBPF member 19                                                   | 108.136 |
| <i>MAP3K20</i>  | Mitogen-activated protein kinase kinase kinase 20                | 108.245 |
| <i>PAXX</i>     | PAXX non-homologous end joining factor                           | 108.657 |
| <i>BRAP</i>     | BRCA1-associated protein                                         | 109.161 |
| <i>HTATIP2</i>  | HIV-1 Tat interactive protein 2                                  | 109.472 |
| <i>ETV3</i>     | ETS variant transcription factor 3                               | 109.553 |
| <i>LIMCH1</i>   | LIM and calponin homology domains 1                              | 110.228 |
| <i>SFSWAP</i>   | Splicing factor SWAP                                             | 110.251 |
| <i>FHL2</i>     | Four-and-a-half LIM domains 2                                    | 111.968 |
| <i>CCDC80</i>   | Coiled-coil domain-containing 80                                 | 112.731 |
| <i>F3</i>       | Coagulation factor III, tissue factor                            | 114.255 |
| <i>BLZF1</i>    | Basic leucine zipper nuclear factor 1                            | 114.674 |
| <i>MTHFD1L</i>  | Methylenetetrahydrofolate dehydrogenase (NADP+ dependent) 1-like | 114.975 |
| <i>IGFBP3</i>   | Insulin like growth factor binding protein 3                     | 116.779 |
| <i>RIT1</i>     | Ras-like without CAAX 1                                          | 116.814 |

|                        |                                                              |         |
|------------------------|--------------------------------------------------------------|---------|
| <i>MED13L</i>          | Mediator complex subunit 13L                                 | 117.062 |
| <i>ASS1</i>            | Argininosuccinate synthase 1                                 | 119.328 |
| <i>HEXIM1</i>          | HEXIM P-TEFb complex subunit 1                               | 122.322 |
| <i>CCBE1</i>           | Collagen- and calcium-binding EGF domains 1                  | 122.652 |
| <i>S100A3</i>          | S100 calcium-binding protein A3                              | 125.082 |
| <i>MMP1</i>            | Matrix metalloproteinase 1                                   | 127.808 |
| <i>EIF1B</i>           | Eukaryotic translation initiation factor 1B                  | 128.681 |
| <i>PYCR2</i>           | Pyrroline-5-carboxylate reductase 2                          | 129.312 |
| <i>STAG3L2/STAG3L3</i> | Stromal antigen 3-like 3 (pseudogene)                        | 129.46  |
| <i>PCBD2</i>           | Pterin-4 $\alpha$ -carbinolamine dehydratase 2               | 129.723 |
| <i>RGS10</i>           | Regulator of G protein signaling 10                          | 130.062 |
| <i>ZNF143</i>          | Zinc finger protein 143                                      | 130.254 |
| <i>ARFGEF2</i>         | ADP ribosylation factor guanine nucleotide exchange factor 2 | 132.626 |
| <i>ABL2</i>            | ABL proto-oncogene 2, non-receptor tyrosine kinase           | 134.526 |
| <i>RBM18</i>           | RNA binding motif protein 18                                 | 136.216 |
| <i>SDC4</i>            | Syndecan 4                                                   | 140.876 |
| <i>ALYREF</i>          | Aly/REF export factor                                        | 140.923 |
| <i>ACTN1</i>           | Actinin $\alpha$ 1                                           | 142.456 |
| <i>ENOPH1</i>          | Enolase-phosphatase 1                                        | 143.155 |
| <i>SLC35F2</i>         | Solute carrier family 35 member F2                           | 144.051 |
| <i>DCUN1D5</i>         | Defective in cullin neddylation 1 domain-containing 5        | 144.226 |
| <i>PAQR3</i>           | Progestin and adipoQ receptor family member 3                | 146.382 |
| <i>UCK2</i>            | Uridine cytidine kinase 2                                    | 148.743 |
| <i>ASNS</i>            | Asparagine synthetase (glutamine-hydrolyzing)                | 148.99  |
| <i>TIMM13</i>          | Translocase of inner mitochondrial membrane 13               | 152.287 |
| <i>RNF6</i>            | Ring finger protein 6                                        | 152.845 |
| <i>LCORL</i>           | Ligand dependent nuclear receptor corepressor-like           | 154.168 |
| <i>VAT1</i>            | Vesicle amine transport 1                                    | 154.932 |
| <i>NPIP15</i>          | Nuclear pore complex-interacting protein family member B8    | 155.586 |
| <i>S100A4</i>          | S100 calcium binding protein A4                              | 158.592 |
| <i>SMNDC1</i>          | Survival motor neuron domain-containing 1                    | 160.593 |
| <i>KLHL15</i>          | Kelch-like family member 15                                  | 160.805 |
| <i>ARID3A</i>          | AT-rich interaction domain 3A                                | 162.426 |
| <i>WSB1</i>            | WD repeat and SOCS box-containing 1                          | 163.953 |
| <i>GPBP1L1</i>         | GC-rich promoter binding protein 1-like 1                    | 165.591 |
| <i>CPEB4</i>           | Cytoplasmic polyadenylation element binding protein 4        | 168.095 |
| <i>SRSF9</i>           | Serine- and arginine-rich splicing factor 9                  | 168.402 |
| <i>CASP4</i>           | Caspase 4                                                    | 168.811 |
| <i>UFC1</i>            | Ubiquitin-fold modifier-conjugating enzyme 1                 | 172.373 |
| <i>PPP4R3B</i>         | Protein phosphatase 4 regulatory subunit 3B                  | 173.181 |
| <i>ELL2</i>            | Elongation factor for RNA polymerase II 2                    | 173.38  |
| <i>GATA6</i>           | GATA-binding protein 6                                       | 175.096 |
| <i>SYT1</i>            | Synaptotagmin 1                                              | 176.42  |
| <i>EIF3G</i>           | Eukaryotic translation initiation factor 3 subunit G         | 176.556 |
| <i>APOLD1</i>          | Apolipoprotein L domain-containing 1                         | 176.767 |
| <i>KIDINS220</i>       | Kinase D-interacting substrate 220                           | 179.522 |
| <i>GDF15</i>           | Growth differentiation factor 15                             | 181.344 |
| <i>ARF1</i>            | ADP ribosylation factor 1                                    | 184.859 |
| <i>ZFAND3</i>          | Zinc finger AN1-type-containing 3                            | 188.983 |
| <i>EXOC2</i>           | Exocyst complex component 2                                  | 192.435 |

|                     |                                                                                 |         |
|---------------------|---------------------------------------------------------------------------------|---------|
| <i>SARS1</i>        | Seryl-tRNA synthetase 1                                                         | 194.348 |
| <i>LYAR</i>         | Ly1 antibody reactive                                                           | 195.187 |
| <i>PRMT1</i>        | Protein arginine methyltransferase 1                                            | 202.335 |
| <i>RBM14-RBM4</i>   | RBM14-RBM4 readthrough                                                          | 212.244 |
| <i>YBX1</i>         | Y-box binding protein 1                                                         | 212.354 |
| <i>H3-3A/H3-3B</i>  | H3.3 histone A                                                                  | 217.032 |
| <i>SRGN</i>         | Serglycin                                                                       | 222.049 |
| <i>GLRX5</i>        | Glutaredoxin 5                                                                  | 222.452 |
| <i>SNHG32</i>       | Small nucleolar RNA host gene 32                                                | 225.827 |
| <i>TGIF2-RAB5IF</i> | TGIF2-RAB5IF readthrough                                                        | 227.207 |
| <i>NKTR</i>         | Natural killer cell-triggering receptor                                         | 243.194 |
| <i>SNRPA1</i>       | Small nuclear ribonucleoprotein polypeptide A'                                  | 253.328 |
| <i>SLIRP</i>        | SRA stem loop-interacting RNA-binding protein                                   | 259.866 |
| <i>EIF3D</i>        | Eukaryotic translation initiation factor 3 subunit D                            | 278.56  |
| <i>KCTD5</i>        | Potassium channel tetramerization domain-containing 5                           | 280.39  |
| <i>GARS1</i>        | Glycyl-tRNA synthetase 1                                                        | 281.754 |
| <i>MDH2</i>         | Malate dehydrogenase 2                                                          | 287.648 |
| <i>NIFK</i>         | Nucleolar protein interacting with the FHA domain of MKI67                      | 296.404 |
| <i>AURKA</i>        | Aurora kinase A                                                                 | 300.635 |
| <i>YBX3</i>         | Y-box binding protein 3                                                         | 318.446 |
| <i>EIF3H</i>        | Eukaryotic translation initiation factor 3 subunit H                            | 350.246 |
| <i>SNAPC1</i>       | Small nuclear RNA-activating complex polypeptide 1                              | 356.776 |
| <i>RPL18</i>        | Ribosomal protein L18                                                           | 402.44  |
| <i>UBR4</i>         | Ubiquitin protein ligase E3 component n-recognin 4                              | 407.523 |
| <i>SQSTM1</i>       | Sequestosome 1                                                                  | 422.613 |
| <i>NIP7</i>         | Nucleolar pre-rRNA-processing protein NIP7                                      | 474.22  |
| <i>CITED2</i>       | Cbp/p300 interacting transactivator with Glu/Asp-rich carboxy-terminal domain 2 | 566.464 |
| <i>HSPD1</i>        | Heat shock protein family D (Hsp60) member 1                                    | 600.082 |
